# Supplementary material for: Astaxanthin protects against early acute kidney injury in severely burned rats by inactivating the TLR4/MyD88/NF-κB axis and upregulating heme oxygenase-1
Source: PubMed Central journal article supplement (PMC7988001; doi:10.1038/s41598-021-86146-w), 2021-03-23
Supplement: 41598_2021_86146_MOESM2_ESM.pdf [file 41598_2021_86146_MOESM2_ESM.pdf]

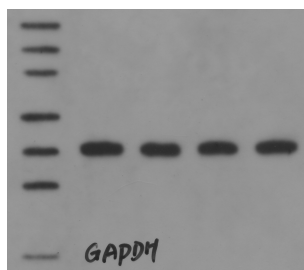

P-P65

p-IK Bd

PLR4

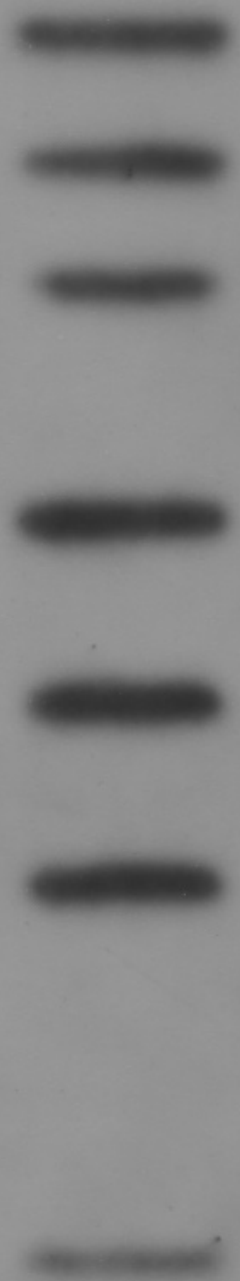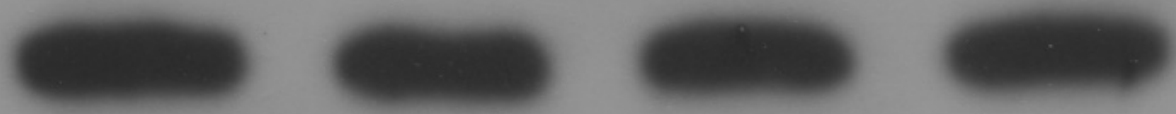

GAPDH

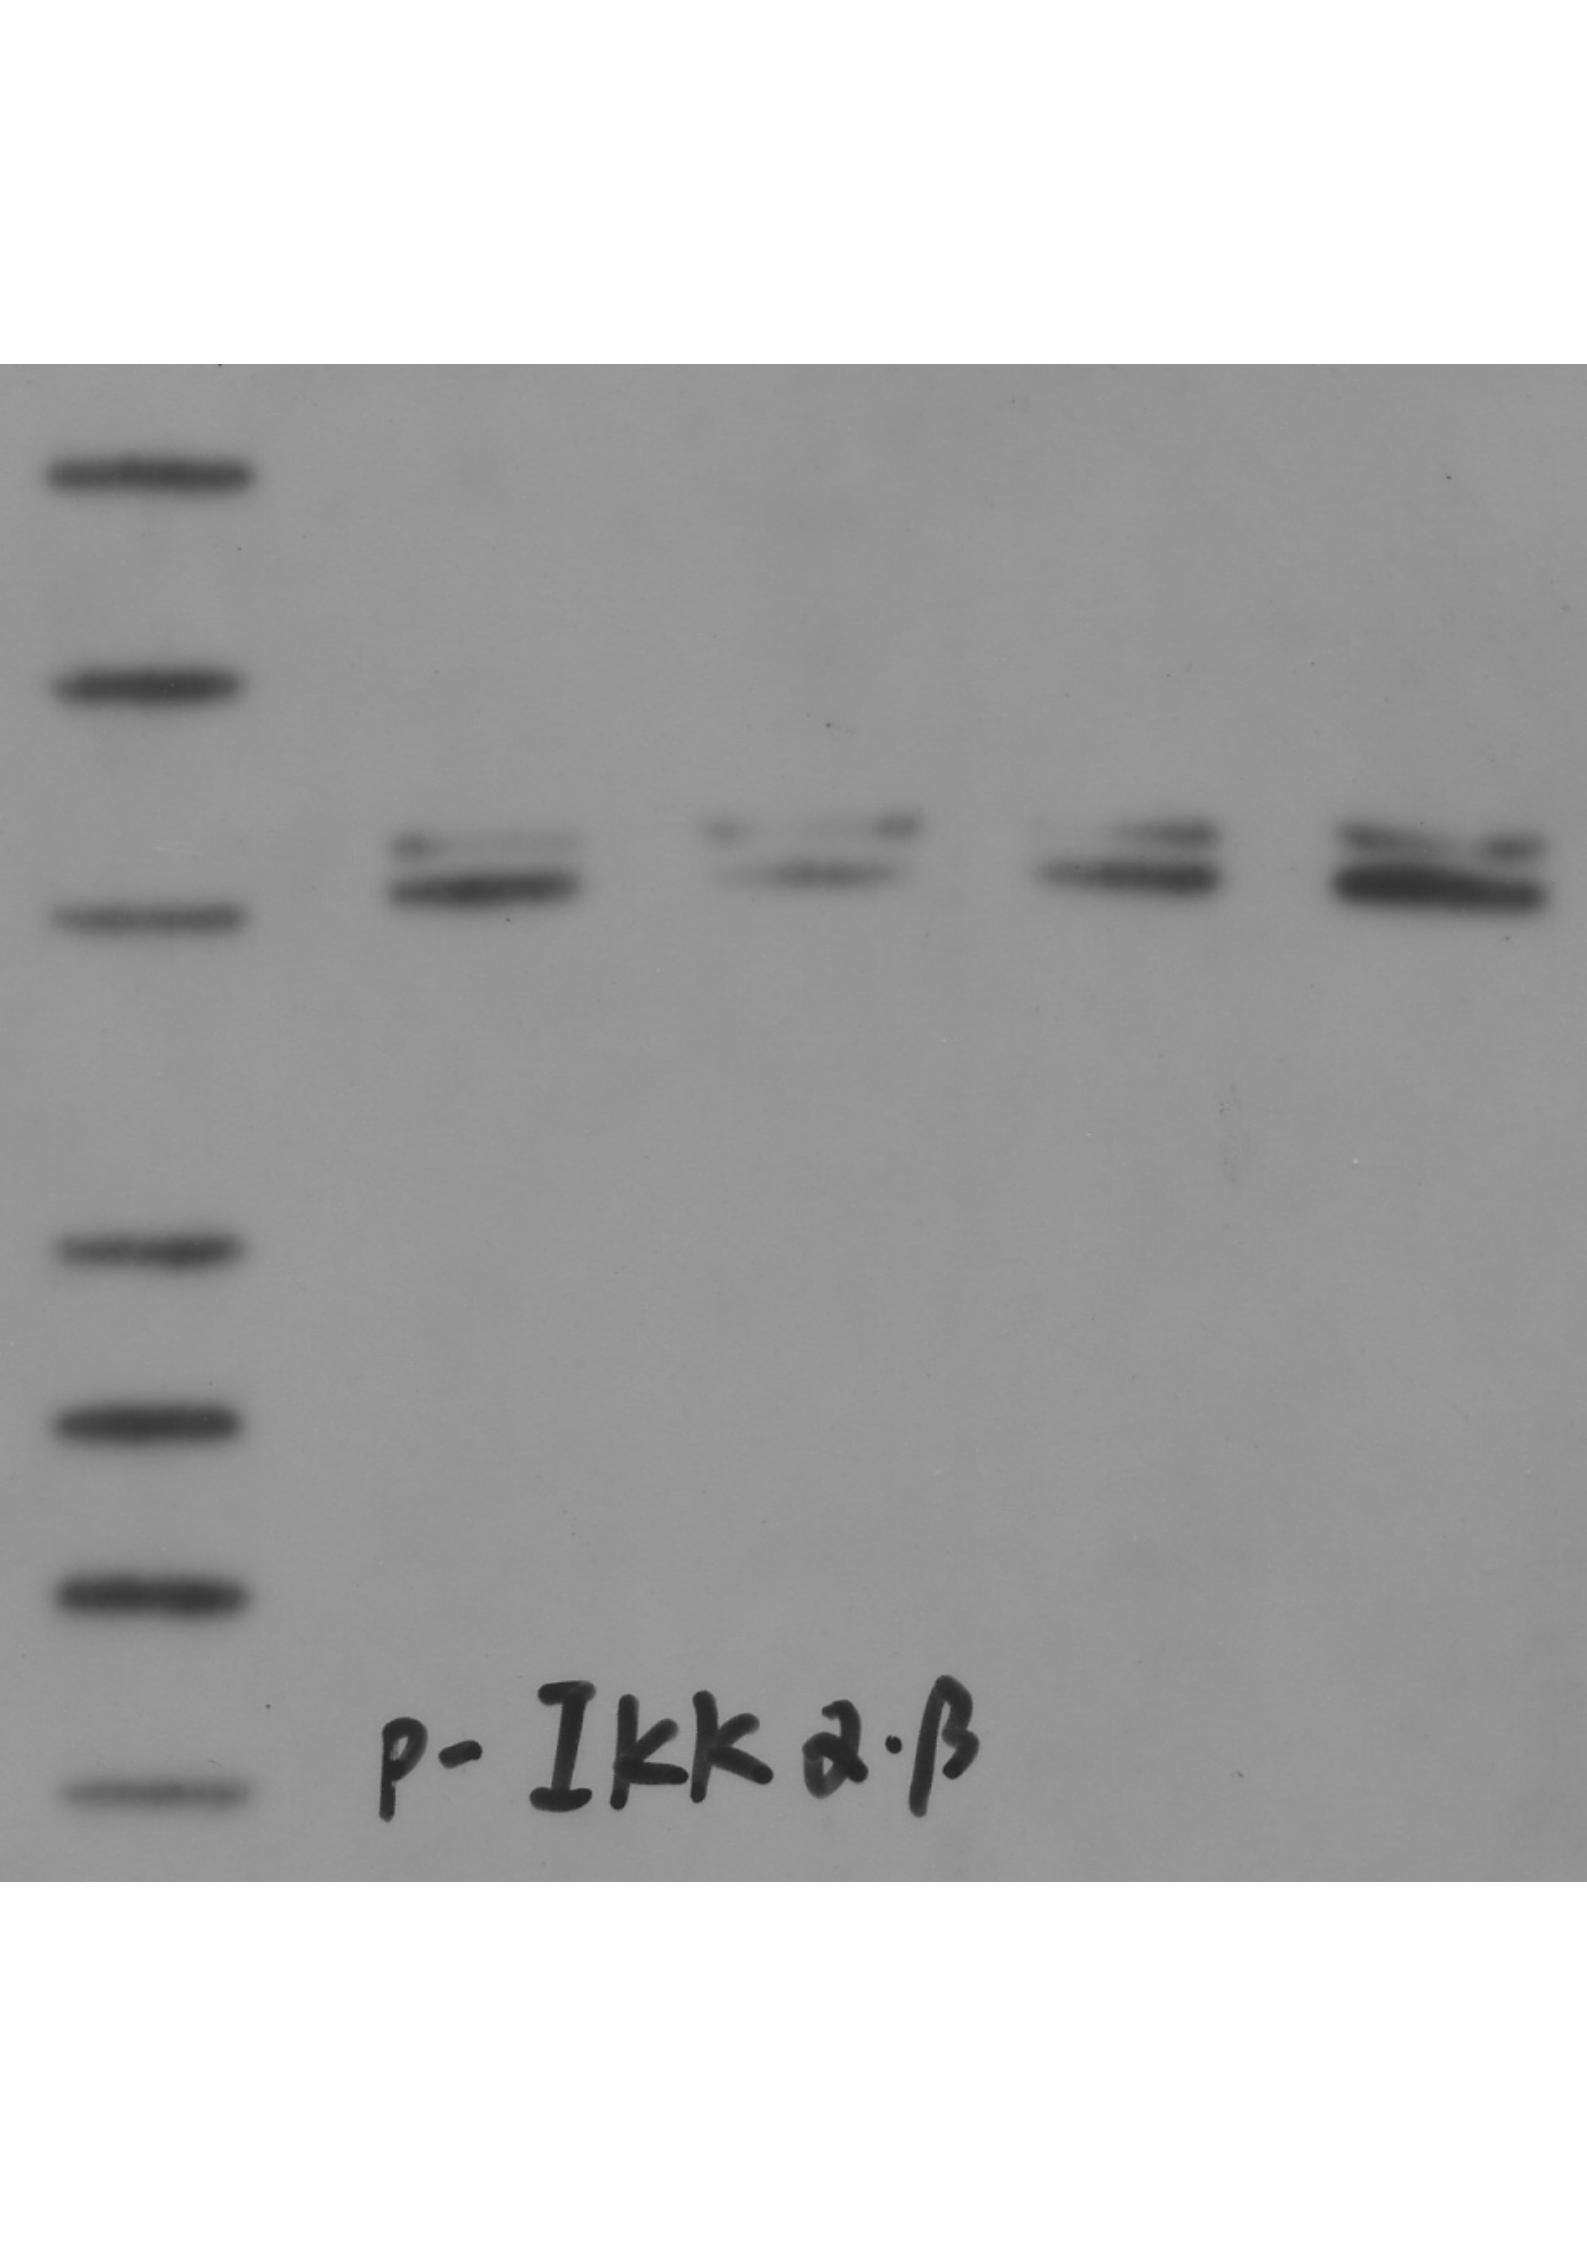

A Western blot image showing multiple lanes. On the left side, there are several vertical bands of varying intensity, likely representing a molecular weight marker. The main part of the image shows four lanes with distinct bands. The bands in the second, third, and fourth lanes from the left are significantly darker and thicker than the band in the first lane, indicating a higher concentration of the protein. The bands are located in the middle section of the blot.

p-IKK  $\alpha$ · $\beta$
